# Supplementary material
Source: HighWire-hosted journal article supplement (https://heart.bmj.com/content/105/10/768)
Supplement: inline-supplementary-material-1 [file inline-supplementary-material-1.docx]

Supplementary Appendix

**List of study sites, troponin assays and number of patients recruited per site**

| **Site** | **Troponin assay** | **99th percentile** | **10% CV*** | **Number of patients included in the study** |
| --- | --- | --- | --- | --- |
| Manchester Royal Infirmary | Roche Elecsys high sensitivity cardiac troponin T | 14ng/L | 13ng/L | 319 |
| Arrowe Park Hospital | Roche Elecsys high sensitivity cardiac troponin T | 14ng/L | 13ng/L | 17 |
| St George’s Hospital, London | Roche Elecsys high sensitivity cardiac troponin T | 14ng/L | 13ng/L | 185 |
| Royal Bolton Hospital | Siemens cardiac troponin I Ultra | 40ng/L | 30ng/L | 43 |
| Royal Devon and Exeter Hospital | Roche Elecsys high sensitivity cardiac troponin T | 14ng/L | 13ng/L | 51 |
| Harrogate District Hospital | Roche Elecsys high sensitivity cardiac troponin T | 14ng/L | 13ng/L | 37 |
| Northumbria Specialist Emergency Care Hospital | Roche Elecsys high sensitivity cardiac troponin T | 14ng/L | 13ng/L | 20 |
| Basingstoke and North Hampshire Hospital | Siemens Centaur cardiac troponin I Ultra | 40ng/L | 30ng/L | 44 |

CV: co-efficient of variation
